# Supplementary material for: Long-read viral metagenomics captures abundant and microdiverse viral populations and their niche-defining genomic islands
Source: PubMed Central journal article supplement (PMC6487183; doi:10.7717/peerj.6800), 2019-04-25
Supplement: peerj-07-6800-s008.pdf [file peerj-07-6800-s008.pdf]

### Median Coverage

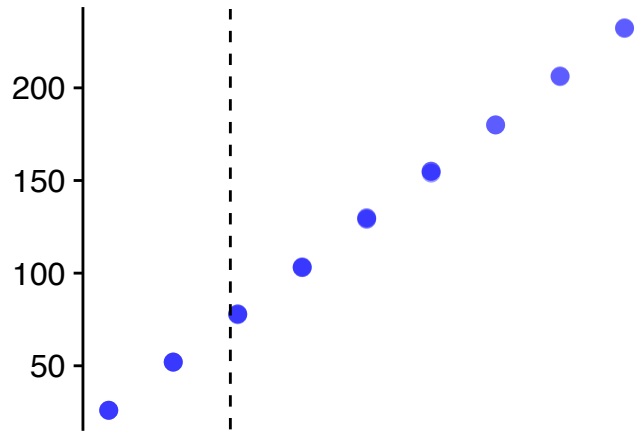

### Total Fixed Insertions

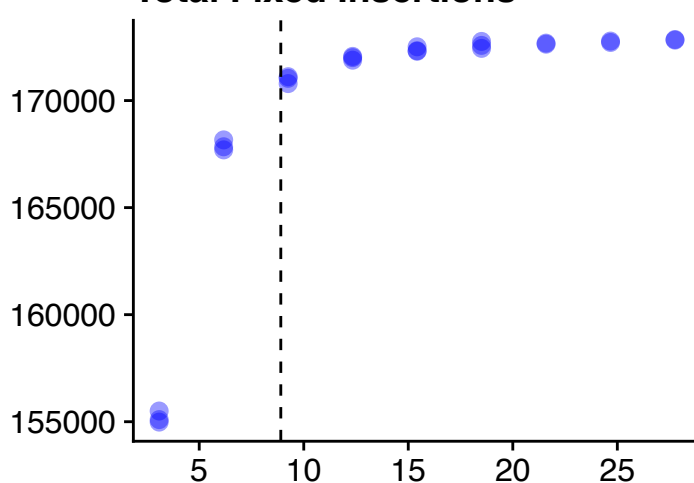

### Total Fixed Deletions

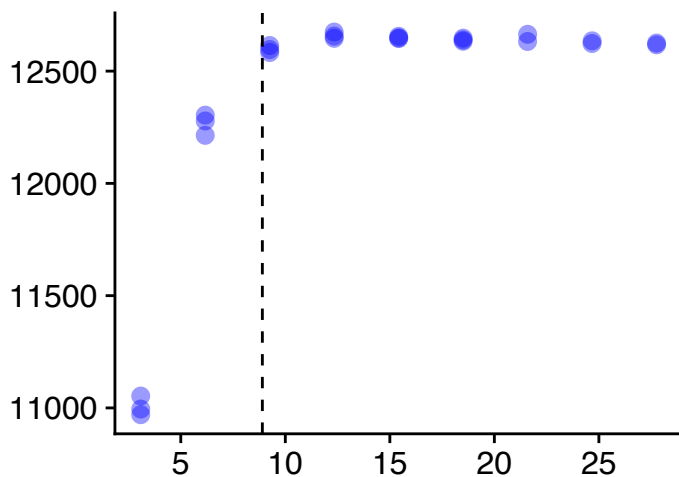

**Gbp of short-read data mapped to Pilon contigs**

Dashed line represents mean size of Global Ocean Virome Datasets
