# Supplementary material for: Long-read viral metagenomics captures abundant and microdiverse viral populations and their niche-defining genomic islands
Source: PubMed Central journal article supplement (PMC6487183; doi:10.7717/peerj.6800), 2019-04-25

# Top 50 most abundant viral contigs in L4 sample

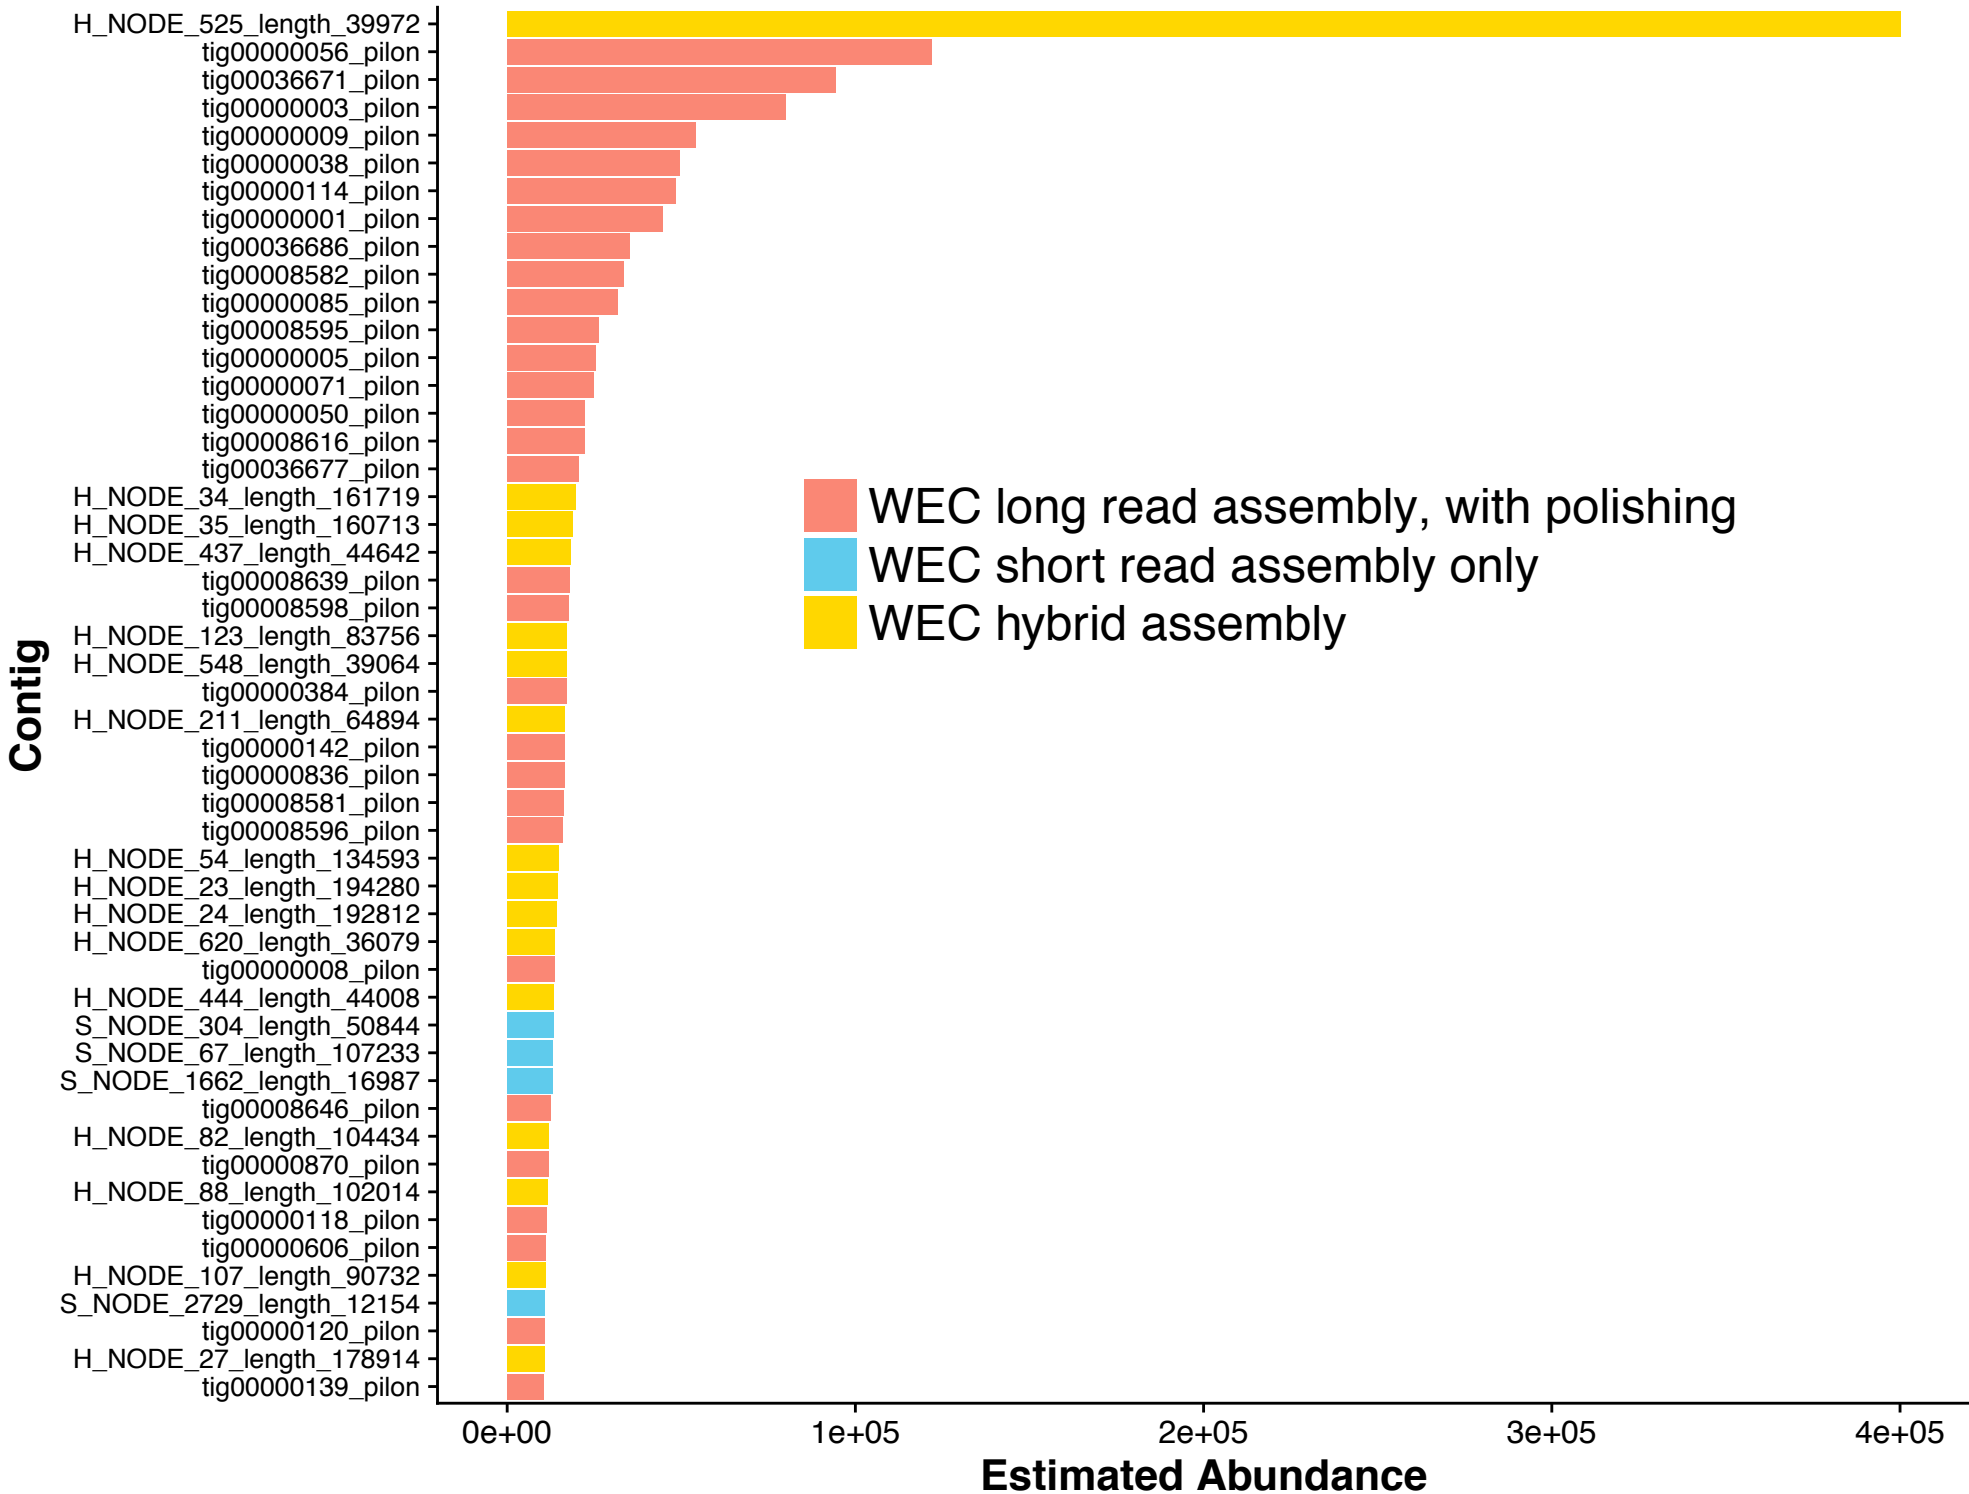

Supplement: peerj-07-6800-s013.pdf [file peerj-07-6800-s013.pdf]
