# Supplementary material for: Long-read viral metagenomics captures abundant and microdiverse viral populations and their niche-defining genomic islands
Source: PeerJ. 2019 Apr 25;7:e6800. doi: 10.7717/peerj.6800 (PMC6487183; doi:10.7717/peerj.6800)
Supplement: Table S5 — For each spanning read, putative start and stop codons were estimated by hierarchical clustering and used as queries in a BLASTx alignment against the NR database. Genes with unknown function were removed and the remaining putatively classified genes were used to assess functional variance within viral genomic islands [file peerj-07-6800-s006.xlsx]

## Sheet: read.fragments.spanning.GIs.gt1
target	target_gi	number of unique reads spanning the GI	unique protein hits	number of unique protein hits	different_at_BLASTP level (<40-50 alignment score) – denotes truly different proteins. Overlapping coordinates denote different proteins encoded at the same point within the GI.	Encoded functions	unique_taxa	unique_taxa_count
H_NODE_2088_length_15010_cov_98.461332	682_to_2230	18	OUW75444.1;AAU84577.1;OUW75446.1;ASR76312.1	4	YES	ribonucleotide reductase;putative ribonucleotide reductase;thymidylate synthase (FAD);thymidylate synthase	1986670;382346;2023996	3
H_NODE_2088_length_15010_cov_98.461332	682_to_2230	18	OUW75444.1;AAU84577.1;OUW75446.1;ASR76312.1	4	YES	ribonucleotide reductase;putative ribonucleotide reductase;thymidylate synthase (FAD);thymidylate synthase	1986670;382346;2023996	3
H_NODE_525_length_39972_cov_71.898281	16112_to_17196	2	AUS00457.1	1	NA	coil containing protein	1881276	1
H_NODE_525_length_39972_cov_71.898281	18248_to_19922	16	AUS00457.1;AUR95636.1;AUR89851.1;AUR89338.1;AUR89786.1;AUR95314.1	6	YES (with overlap of coords)	coil containing protein;C-5 cytosine-specific DNA methylase	1881276;1881406;1881202;1881249;1881250;1881201;1881451	6
P_tig00000003_pilon	18666_to_19885	11	WP_028306850.1;WP_083331054.1;WP_111470155.1;WP_100330403.1	4	NO	gamma-glutamylcyclotransferase	264641;1611323;2230885;2014075	4
P_tig00000003_pilon	21310_to_22804	2	WP_083331054.1	1	NA	gamma-glutamylcyclotransferase	1611323	1
P_tig00000003_pilon	27560_to_28631	8	KPK68563.1	1	NA	isoleucyl-tRNA synthetase	1703385	1
P_tig00000003_pilon	44705_to_46488	5	BAR34763.1;WP_068358378.1;BAR25633.1	3	YES (with overlap of coords)	constituent protein;tail fiber domain-containing protein	1407671;1689867	2
P_tig00000003_pilon	47366_to_48816	5	WP_068358378.1	1	NA	tail fiber domain-containing protein	1689867	1
P_tig00000003_pilon	5595_to_6707	6	ASN63044.1;ASN63823.1;ASN63736.1;ASN63578.1	4	NO	co-chaperonin GroES;co-chaperonin GroES, partial	340016	1
P_tig00000038_pilon	18943_to_20058	3	OUV54685.1;WP_108864776.1	2	NO	RNA polymerase sigma factor, RpoD/SigA family	1986866;2015205	2
P_tig00000038_pilon	20132_to_21184	4	OUV54685.1;WP_108864776.1	2	NO	RNA polymerase sigma factor, RpoD/SigA family	1986866;2015205	2
P_tig00000038_pilon	41192_to_42774	4	YP_005087504.1;BAR34087.1	2	NO	gp165;Na-Ca exchanger/integrin-beta4	445693;1407671	2
P_tig00000038_pilon	53017_to_54885	2	AAP82224.1;KGA05869.1	2	YES (with overlap of coords)	DNA polymerase, partial;lipase	236210;1504317	2
P_tig00000038_pilon	57018_to_58408	1	OUW75446.1	1	NA	thymidylate synthase (FAD)	1986670	1
P_tig00000038_pilon	61843_to_63048	30	OUW75446.1;OUW75444.1;KGG28506.1;YP_007006170.1;AAU84577.1;WP_108865931.1	6	YES (with overlap of coords)	thymidylate synthase (FAD);ribonucleotide reductase;Thymidylate synthase thyX;thymidylate synthase;putative ribonucleotide reductase;translation initiation factor IF-1	1986670;1499503;1137745;382346;2015205	5
P_tig00000038_pilon	63060_to_64955	22	OUW75444.1;OUW75446.1;AAU84577.1;WP_108865931.1	4	YES (with overlap of coords)	ribonucleotide reductase;thymidylate synthase (FAD);putative ribonucleotide reductase;translation initiation factor IF-1	1986670;382346;2015205	3
P_tig00000038_pilon	72711_to_73877	29	AOV60349.1;BAQ93977.1;BAR30446.1;YP_004322405.1;YP_004324037.1;YP_004324586.1;AHY47421.1;AAU84560.1;OUX12389.1;YP_007001933.1;GBE36564.1;AFK66480.1	12	Maybe - rare lipoprotein has a poor match to photosystemII	photosystem II protein D1;psbA photosystem II, DI subunit;transaldolase-like protein;photosystem II D1 protein;rlpA: rare lipoprotein A;photosystem II q(b) protein;carboxylesterase;RlpA-like protein precursor;rare lipoprotein A	1883369;1407671;444860;445684;536473;444861;42256;643560;382346;1986753;754038;1079998;1340811;1340812;1493507;1493508;2005730;754059;756276	11
P_tig00000050_pilon	2780_to_4256	4	ALP53441.1;OUX03755.1	2	YES (with overlap of coords)	cell wall hydrolase;acyl-CoA thioesterase	1748243;1986818	2
P_tig00000071_pilon	35122_to_37058	1	OUV50283.1	1	NA	thymidylate synthase (FAD)	1986798	1
P_tig00000071_pilon	9194_to_11308	3	OUT37786.1;OUV94365.1	2	NO	UV damage repair endonuclease UvsE	1986783;1986686	2
P_tig00000085_pilon	37240_to_39127	4	ASF00183.1	1	NA	putative structural protein	340016	1
P_tig00000114_pilon	24684_to_25758	5	AIW56775.1;AIW56776.1;AIW56728.1	3	YES (with overlap of coords)	nucleotide pyrophosphohydrolase domain protein;adenosylcobalamin-dependent ribonucleoside-triphosphate reductase;ribonucleotide reductase, partial	340016	1
P_tig00000114_pilon	36599_to_38632	9	YP_008320271.1;WP_105461697.1;YP_008320272.1;ASF00074.1;OUV73970.1;ASF00073.1;AIW56777.1	7	YES (with overlap of coords)	phage integrase;DNA cytosine methyltransferase;DNA primase;putative replicative DNA helicase;thymidylate synthase (FAD);putative DNA primase	948071;562;340016;1986721	4
P_tig00000114_pilon	4973_to_7039	7	BAQ85801.1;BAR31666.1;BAR20379.1	3	NO	putative tail fiber;gp7;phage tail fiber-like protein	1407671	1
P_tig00000141_pilon	13120_to_14319	2	EMB50505.1;WP_111140794.1	2	NO	VgrG-3 protein;glycoside hydrolase family 19 protein	1259812;2027922	2
P_tig00000142_pilon	33829_to_35105	7	AMQ66428.1	1	NA	putative phage head protein	340016	1
P_tig00000179_pilon	34455_to_36061	11	ANS05039.1;ANS05040.1;ANS05041.1;ANS05038.1;ANS05047.1;OUX33342.1	6	YES (with overlap of coords)	major capsid protein;prohead core protein;prohead core scaffold and protease;tail tube protein;capsid assembly protein;ATP-binding protein	1868660;1986824	2
P_tig00000206_pilon	14176_to_15528	4	ANS05029.1	1	NA	exonuclease SbcC	1868660	1
P_tig00000366_pilon	12472_to_14027	2	AQM32712.1;BAR34754.1	2	YES (with overlap of coords)	DNA polymerase A;Superfamily II DNA/RNA helicases, SNF2 family (HepA)	340016;1407671	2
P_tig00000539_pilon	7265_to_8482	10	YP_008320314.1;ASF00605.1;ASF00112.1;YP_008320313.1	4	YES (with overlap of coords)	phage terminase large subunit;putative portal protein;putative phage terminase large subunit	948071;340016	2
P_tig00000616_pilon	5338_to_7267	6	BAR34751.1;PPR41444.1;BAR36388.1	3	YES (with overlap of coords)	phage/plasmid primase;ATP-dependent DNA helicase Rep	1407671;2013089	2
P_tig00000839_pilon	4122_to_5402	3	OUW36150.1;AUZ94996.1;WP_013045415.1	3	YES (but adjacent genes)	threonine ammonia-lyase;DNA double-strand break repair Rad50 ATPase;threonine/serine dehydratase	1986629;2024264;488538;767892	3
P_tig00001028_pilon	10539_to_11775	12	AIW56734.1;KKK46341.1;AIW56741.1;KKK40627.1	4	NO	ribonucleotide reductase, partial;putative adenosylcobalamin-dependent ribonucleoside-triphosphate reductase;Adenosylcobalamin-dependent ribonucleoside-triphosphate reductase	340016;1538547	2
P_tig00001145_pilon	9218_to_10332	2	BAQ92513.1	1	NA	nuclease	1407671	1
P_tig00001187_pilon	2724_to_5103	18	BAR32046.1;BAR32044.1;BAR28111.1;BAR15690.1;BAR15689.1;BAR15688.1;BAR32045.1;BAR38443.1;BAR20388.1;BAR15687.1;BAR20386.1	11	YES (with overlap of coords)	putative ferrochelatase;Uncharacterized iron-regulated protein (PiuC);Putative 2OG-Fe(II) oxygenase;2OG-Fe(II) oxygenase;Fe(II)-dependent oxygenase superfamily protein;putative 2OG-Fe(II) oxygenase	1407671	1
P_tig00008582_pilon	30373_to_31792	22	AUR84589.1;AUR85019.1;AUR86910.1;BAQ92503.1	4	YES (with overlap of coords)	coat protein;putative carbohydrate-binding module	1881307;1881310;1881320;1407671	4
P_tig00008588_pilon	28596_to_31134	2	ASF00491.1	1	NA	putative terminase large subunit	340016	1
P_tig00008591_pilon	9423_to_10900	4	WP_092226321.1;BAQ90505.1;WP_089970817.1	3	NO	DNA (cytosine-5-)-methyltransferase;Site-specific DNA methylase (Dcm)	91360;1407671;1173111	3
P_tig00008592_pilon	14777_to_16897	7	PCH98492.1;BAQ88117.1	2	YES (with overlap of coords)	TerL;Head-tail connector protein	1904441;1407671	2
P_tig00008596_pilon	6745_to_8711	4	BAR16373.1;BAR31666.1;BAR20379.1;BAR16213.1;BAQ85801.1	5	NO	putative tail fiber;gp7;phage tail fiber-like protein	1407671	1
P_tig00008598_pilon	24611_to_26999	8	BAQ89664.1	1	NA	Antirestriction protein (COG4227)	1407671	1
P_tig00008598_pilon	27266_to_28513	2	PZC48497.1	1	NA	Superfamily II DNA or RNA helicase, SNF2 family	2026724	1
P_tig00008598_pilon	29473_to_30622	6	PZC48497.1;AQM32712.1	2	YES (with overlap of coords)	Superfamily II DNA or RNA helicase, SNF2 family;DNA polymerase A	2026724;340016	2
P_tig00008598_pilon	5158_to_6246	2	ASN63458.1;ASN63543.1	2	NO	co-chaperonin GroES	340016	1
P_tig00008599_pilon	7084_to_9147	1	BAR24710.1;BAQ93519.1	2	NO	lectin domain containing protein	1407671	1
P_tig00008605_pilon	16754_to_18162	2	OUV50283.1;OUV94321.1	2	YES (with overlap of coords)	thymidylate synthase (FAD);ribonucleoside-diphosphate reductase, adenosylcobalamin-dependent	1986798;1986686	2
P_tig00008605_pilon	18212_to_19441	2	OUX13542.1;OUV50283.1;OUV94321.1	3	YES (with overlap of coords)	thymidylate synthase (FAD);ribonucleoside-diphosphate reductase, adenosylcobalamin-dependent	1986753;1986798;1986686	3
P_tig00008620_pilon	12793_to_13887	2	ANS05656.1	1	NO	SNF2 family superfamily II DNA/RNA helicase	1868660	1
P_tig00008621_pilon	1544_to_2826	7	ANS05656.1;BAR36388.1;BAR36384.1	3	NO	SNF2 family superfamily II DNA/RNA helicase;phage/plasmid primase;Superfamily II DNA/RNA helicases, SNF2 family (HepA)	1868660;1407671	2
P_tig00008633_pilon	6464_to_7907	18	ASF00622.1;BAR36407.1;AGX13785.1;AGX13782.1	4	YES (with overlap of coords)	putative exonuclease;endonuclease;putative DNA polymerase A	340016;1407671	2
P_tig00008639_pilon	15810_to_16827	4	BAQ94135.1;BAR25361.1	2	NO	Phage protein Gp37/Gp68-like protein	1407671	1
P_tig00008646_pilon	16500_to_18315	4	ASN63369.1;ASN63763.1;ASN63625.1	3	NO	co-chaperonin GroES	340016	1
P_tig00008651_pilon	11233_to_13288	3	WP_090735668.1;AKU42621.1;YP_001285701.2	3	YES (with overlap of coords)	HNH endonuclease;putative RecA-like NTPase;p31.1	364199;1673892;470314	3
P_tig00008658_pilon	1881_to_3395	2	ASN63135.1;ASN63623.1	2	NO	co-chaperonin GroES;co-chaperonin GroES, partial	340016	1
P_tig00008679_pilon	6964_to_8277	5	BAR16213.1;BAR16373.1;WP_068358378.1;ANS05062.1;ANS05884.1;BAQ85801.1	6	NO	putative tail fiber;tail fiber domain-containing protein;cadherin;outer membrane protein	1407671;1689867;1868660	3
P_tig00008679_pilon	886_to_2248	12	ASN63075.1;ASN63507.1;ASN63428.1;ASN63746.1;ASN63086.1;ASN63173.1;ASN63079.1;ASN63053.1	8	NO	co-chaperonin GroES	340016	1
P_tig00036671_pilon	30712_to_32335	5	YP_009301267.1;YP_008059148.1	2	YES (with overlap of coords)	terminase large subunit;portal protein	1796995;1273748	2
P_tig00036671_pilon	38846_to_41681	12	ANS04809.1	1	NA	major capsid protein	1868660	1
P_tig00036671_pilon	44074_to_46097	2	BAQ85281.1;WP_062218564.1	2	NO	YapH protein;head decoration protein	1407671;1397108	2
P_tig00036671_pilon	49405_to_53030	3	BAQ85281.1;YP_009042171.1	2	NO	YapH protein;phage fiber protein	1407671;1465639	2
P_tig00036677_pilon	46755_to_48870	12	ASF00605.1;YP_008320314.1;YP_008320313.1;ASF00112.1	4	YES (with overlap of coords)	putative portal protein;phage terminase large subunit;putative phage terminase large subunit	340016;948071	2
P_tig00036706_pilon	2803_to_4121	10	BAR36384.1;ANS05656.1	2	NO	Superfamily II DNA/RNA helicases, SNF2 family (HepA);SNF2 family superfamily II DNA/RNA helicase	1407671;1868660	2
P_tig00036774_pilon	4585_to_6975	6	ASN63338.1;ASN63360.1;ASN63701.1;ASN63026.1;ASN63270.1	5	NO	co-chaperonin GroES	340016	1
S_NODE_1886_length_15618_cov_97.637725	7816_to_9387	8	AMQ66428.1	1	NA	putative phage head protein	340016	1
S_NODE_2215_length_14094_cov_84.729577	6514_to_7827	10	BAQ84625.1;BAQ84620.1	2	YES (with overlap of coords)	Integrase (XerC);chromosomal replication initiator protein DnaA (TIGR00362)	1407671	1
